# Supplementary material
Source: Springer Nature journal article supplement (https://www.springermedizin.de/resource/supplementary/12960_2009_171_MOESM3_ESM.pdf/9570564)

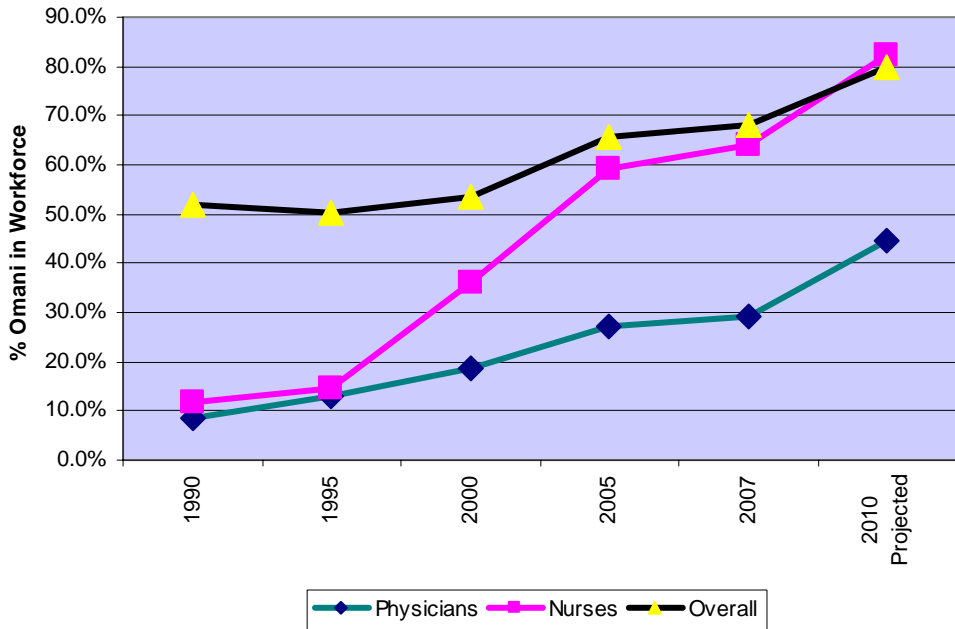

Supplement: MOESM3 [file 9570564]
